# Supplementary material for: Human Rev1 relies on insert-2 to promote selective binding and accurate replication of stabilized G-quadruplex motifs
Source: Nucleic Acids Res. 2021 Feb 8;49(4):2065–84. doi: 10.1093/nar/gkab041 (PMC7913688; doi:10.1093/nar/gkab041)
Supplement: gkab041_Supplemental_File [file gkab041_supplemental_file.pdf]

## Supplementary materials for

### **Human Rev1 relies on insert-2 to promote selective binding and accurate replication of stabilized G-quadruplex motifs**

*Amit Ketkar<sup>1</sup>, Lane Smith<sup>1</sup>, Callie Johnson<sup>3</sup>, Alyssa Richey<sup>3</sup>, Makayla Berry<sup>1</sup>, Jessica H. Hartman<sup>4</sup>, Leena Maddukuri<sup>1</sup>, Megan R. Reed<sup>1</sup>, Julie Gunderson<sup>5</sup>, Justin W.C. Leung<sup>2</sup>, and Robert L. Eoff<sup>1,\*</sup>*

<sup>1</sup>Department of Biochemistry and Molecular Biology and <sup>2</sup>Department of Radiation Oncology, University of Arkansas for Medical Sciences, Little Rock, AR 72205, USA, <sup>3</sup>Arkansas School for Mathematics, Sciences, and the Arts, Hot Springs, AR 71901, USA, <sup>4</sup>Department of Biochemistry and Molecular Biology, Medical University of South Carolina, Charleston, SC 29425, USA, <sup>5</sup>Department of Physics, Hendrix College, Conway, AR 72032, USA.

\* To whom correspondence should be addressed. Tel: +1 501 686 8343; Fax: +1 501 686 8169; Email: [RLEoff@uams.edu](mailto:RLEoff@uams.edu)

*Running title: Human Rev1 interaction with G-quadruplex DNA*

## SUPPORTING INFORMATION

### CONTENTS

#### Supplementary materials and methods

**Table S1.** CD melting temperatures of the ss-DNA G4 oligos used in this study.

**Table S2.** Equilibrium dissociation constants for hRev1<sup>330-833</sup> binding to ss-G4 and non-G4 DNA substrates in a buffer containing 100 mM LiCl.

**Table S3.** Equilibrium dissociation constants for hRev1<sup>330-833</sup> binding to ds-G4 and non-G4 DNA substrates in a buffer containing 100 mM KCl.

**Table S4.** hRev1<sup>1-1251</sup>-derived peptides (trypsin-digested) identified by mass spectrometry.

**Figure S1.** Circular dichroism spectra of the DNA oligonucleotides used in this study.

**Figure S2.** Purification and CD spectra of hRev1<sup>330-833</sup> wild-type and mutant proteins.

**Figure S3.** Cloning, purification, DNA binding and enzyme activity of full-length hRev1<sup>1-1251</sup>.

**Figure S4.** Schematic showing the DNA sequence of the pSP189 plasmids used in the forward mutagenesis assay.

**Figure S5.** Uncropped immunoblots of whole-cell lysates from HAP-1 *REV1*<sup>KO</sup> cells transiently transfected with the pMH-SFB-Rev1 wild-type and mutant plasmids.

**Figure S6.** Alignment of the G4-*supF* plasmid sequences obtained from white MBM7070 *E. coli* colonies after replication in HAP-1 cells.

**Figure S7.** Alignment of the G4-*supF* plasmid sequences obtained from white MBM7070 *E. coli* colonies after replication in HAP-1 *REV1*<sup>KO</sup> cells.

**Figure S8.** Sequence information, circular dichroism spectra and DNA binding of the putative G4-forming sequence identified at the *REV1* promoter.

**Figure S9.** Binding affinity of hRev1<sup>330-833</sup> to primer-template G4 DNA substrates.

**Figure S10.** Alignment of the Rev1 polymerase domain from multiple species.

## Supplementary materials and methods

### *Circular dichroism spectroscopy -*

Circular dichroism (CD) spectroscopy for all DNA oligonucleotide substrates was performed on a Jasco J-1100 spectropolarimeter (Jasco, Easton, MD, USA). The ss-DNA G4 or non G4 oligos, or the corresponding primer-template ds-DNA substrates were prepared by annealing, as described in Methods. Solutions were prepared in 10 mM Tris-HCl, pH 7.5, containing either 100 mM KCl or LiCl. For measuring spectra, DNA was taken at a concentration of 5  $\mu$ M in a total volume of 200  $\mu$ L of buffer in a quartz cuvette with pathlength of 1 mm. Spectra were measured between the wavelength range of 230 nm to 330 nm, with a band-width of 1 nm, data pitch of 0.1 nm, at a scanning speed of 100 nm/min. Spectra were reported as an average of three scans. A similar scan of the buffer alone was used as blank to subtract and obtain the corrected spectra for oligo substrates. Thermal stability for the ss-G4 oligo substrates was measured by monitoring the change in CD signal at the corresponding peak wavelength, across a temperature range of 4°C to 95°C, by applying a melting temperature gradient of 1°C/min. An average of two scans was reported. Data analysis was performed using Graphpad Prism (San Diego, CA, USA), and the melting temperature values were obtained by fitting the data to a four-parameter logistic model allowing a variable slope.

### *Immunoblotting -*

Aliquots at different stages during purification (lysate, supernatant after interaction with streptavidin-Sepharose beads, biotin-eluted fraction, etc.) from the large-scale culture of HEK293T cells stably expressing SFB-tagged hRev1<sup>1-1251</sup> were retained during protein purification. These were then loaded on a 4–20% gradient SDS-PAGE gel (Bio-Rad Laboratories, Hercules, CA, USA), and electrophoresis was performed at 120 V for 80 min. The separated proteins were transferred to a 0.2  $\mu$ m polyvinylidene difluoride membrane (Bio-Rad; Cat # 162-0177) at 4°C at 200 mA for 90 min. After blocking with 5% (w/v) nonfat milk in 1X Tris-buffered saline (TBS), western blotting to detect the presence of SFB-tagged hRev1<sup>1-1251</sup> was performed by probing the membrane with the rabbit polyclonal anti-FLAG epitope antibody (Novus Biologicals; Cat # NB600-345). Dilution of the primary antibody was 1:1000 made in 1X TBS containing 1% (w/v) BSA. The blots were also probed with a rabbit anti-GAPDH primary antibody (Cell Signaling Technologies, Danvers, MA, USA; Cat #2118S) used at 1:10,000 dilution as loading control. Horseradish peroxidase-coupled anti-rabbit secondary antibody (Thermo-Scientific; Cat #32460) was used at a 1:2000 dilution. Blot was developed by enhanced chemiluminescence using the ECL kit (Bio-Rad; Cat # 170-5060) and the bands were visualized on a ChemiDoc MP imaging system (Bio-Rad; Cat # 12003154).

For the HAP-1 *REV1*<sup>KO</sup> cells transiently transfected to express the SFB-tagged hRev1<sup>1-1251</sup> wild-type or mutant proteins, whole cell lysates were prepared 48 hrs post-transfection. *REV1*<sup>KO</sup> cells that were sham-transfected (no plasmid) were used as untransfected control. Protein concentration of the lysates was estimated using the Pierce BCA assay kit (Thermo-Fisher Cat#23225). 50  $\mu$ g of each lysate sample was loaded and separated by gel electrophoresis followed by transfer and blocking as described earlier. The immunoblot was then probed with the rabbit polyclonal anti-FLAG epitope antibody (Novus Biologicals; Cat # NB600-345; 1:1000 [v/v] dilution) to detect the level of each SFB-

hRev1 protein expression. The blot was subsequently also probed for loading control, with a rhodamine-conjugated anti-actin FAB (Bio-Rad12004164; 1:2000 [v/v] dilution).

**Table S1.** Melting temperatures of the G4 ssDNA substrates used in the study, measured by CD, in 10 mM Tris-Cl buffer (pH 7.5) containing 100 mM KCl/LiCl.

|                   | $T_m^a(^{\circ}\text{C})$<br>[100 mM KCl] | $T_m(^{\circ}\text{C})$<br>[100 mM LiCl] |
|-------------------|-------------------------------------------|------------------------------------------|
| <b>Myc 14/23</b>  | 91 ± 3                                    | 52 ± 4                                   |
| <b>Myc 2/11</b>   | 84 ± 4                                    | 49 ± 2                                   |
| <b>Rev1-prom</b>  | 80 ± 3                                    | 51 ± 4                                   |
| <b>Bcl-2 1245</b> | 66 ± 5                                    | 53 ± 3                                   |
| <b>KRAS 22RT</b>  | 56 ± 3                                    | 44 ± 1                                   |
| <b>TBA</b>        | 48 ± 7                                    | 38 ± 4                                   |
| <b>hTelo-4</b>    | 62 ± 5                                    | 41 ± 4                                   |

<sup>a</sup>  $T_m$  values reported represent the mean ± SD (n=3).

**Table S2.** Equilibrium dissociation constants for hRev1<sup>330-833</sup> binding to ss-G4 and non-G4 DNA substrates in a buffer containing 100 mM LiCl.<sup>b</sup>

|                   | $K_{D,DNA}$ |           | Fold preference for G4 DNA         |
|-------------------|-------------|-----------|------------------------------------|
|                   | Non-G4 (nM) | G4 (nM)   | $(K_{D,NonG4\ DNA}/K_{D,G4\ DNA})$ |
| <b>Myc 14/23</b>  | 760 ± 290   | 220 ± 70  | 4                                  |
| <b>Myc 2/11</b>   | -           | 90 ± 20   | 8                                  |
| <b>Rev1-prom</b>  | 260 ± 120   | 180 ± 70  | 2                                  |
| <b>Bcl-2 1245</b> | 750 ± 340   | 200 ± 40  | 4                                  |
| <b>KRAS 22RT</b>  | 1620 ± 800  | 250 ± 130 | 7                                  |
| <b>TBA</b>        | 310 ± 40    | 140 ± 20  | 2                                  |
| <b>hTelo-4</b>    | 920 ± 120   | 630 ± 100 | 2                                  |

<sup>b</sup>Fluorescence polarization experiments were performed by titrating hRev1<sup>330-833</sup> into a solution containing the indicated ss-DNA substrate containing 100 mM LiCl. The resulting equilibrium dissociation constant values were calculated by fitting the resulting polarization values to a quadratic equation. Data represent the mean ± SD (n=3).

**Table S3.** Equilibrium dissociation constants for hRev1<sup>330-833</sup> binding to ds-G4 and non-G4 DNA substrates in a buffer containing 100 mM KCl.<sup>c</sup>

|            | $K_{D,DNA}$ |          | Fold preference for G4 DNA<br>( $K_{D,NonG4\ DNA}/K_{D,G4\ DNA}$ ) |
|------------|-------------|----------|--------------------------------------------------------------------|
|            | Non-G4 (nM) | G4 (nM)  |                                                                    |
| Myc 14/23  | 770 ± 80    | 59 ± 9   | 13                                                                 |
| Myc 2/11   | -           | 45 ± 6   | 17                                                                 |
| Rev1-prom  | 154 ± 30    | 11 ± 2   | 14                                                                 |
| Bcl-2 1245 | 660 ± 120   | 97 ± 20  | 7                                                                  |
| KRAS 22RT  | 1120 ± 80   | 120 ± 10 | 9                                                                  |
| TBA        | 270 ± 30    | 165 ± 25 | 2                                                                  |
| hTelo-4    | 1600 ± 320  | 840 ± 50 | 2                                                                  |

<sup>c</sup>Fluorescence polarization experiments were performed by titrating hRev1<sup>330-833</sup> into a solution containing the indicated ds-DNA substrate containing 100 mM KCl. The resulting equilibrium dissociation constant values were calculated by fitting the resulting polarization values to a quadratic equation. Data represent the mean ± SD (n=3).

**Table S4.** hRev1<sup>1-1251</sup>-derived peptides (trypsin-digested) identified by mass spectrometry.

| Peptide Sequence<br>(Trypsin cleavage sites in parentheses) | m/z     | M.W.    | Charge<br>state | Residue<br>(Start-<br>End) |
|-------------------------------------------------------------|---------|---------|-----------------|----------------------------|
| (K)AAPSVPSKPSDcNFISNFYSHSR(L) <sup>*</sup>                  | 856.73  | 2567.18 | +3              | 335-357                    |
| (R)LHHISMWK(C)                                              | 526.28  | 1050.54 | +2              | 358-365                    |
| (K)cELTEFVNTLQR(Q)                                          | 755.37  | 1508.73 | +2              | 366-377                    |
| (R)QSnGIFPGREK(L) <sup>*</sup>                              | 617.31  | 1232.62 | +2              | 378-388                    |
| (R)QSnGIFPGREK(L) <sup>**</sup>                             | 683.33  | 1364.64 | +2              | 378-388                    |
| (K)mKTGRSALVVTDGTGDmSVLNSPR(H) <sup>*</sup>                 | 650.57  | 2598.24 | +4              | 392-414                    |
| (R)SALVVTDGTGDMSVLNSPR(H)                                   | 621.32  | 1860.93 | +3              | 397-414                    |
| (R)HQScImHVDMDcFFVSVGIR(N)                                  | 818.70  | 2453.07 | +3              | 415-434                    |
| (R)NRPDLKGKPVAVTSNR(G)                                      | 438.75  | 1750.98 | +4              | 435-450                    |
| (R)NRPDLKGKPVAVTSNR(G)                                      | 471.76  | 1883.00 | +4              | 435-450                    |
| (K)GKPVAVTSNRGTGR(A)                                        | 700.39  | 1398.77 | +2              | 441-454                    |
| (K)GKPVAVTSNRGTGR(A)                                        | 511.27  | 1530.79 | +3              | 441-454                    |
| (R)GTGRAPLRPGANPQLEWQYYQNK(I)                               | 661.84  | 2643.33 | +4              | 451-473                    |
| (R)GTGRAPLRPGANPQLEWQYYQNK(I)                               | 694.85  | 2775.35 | +4              | 451-473                    |
| (R)APLRPGANPQLEWQYYQNK(I)                                   | 758.39  | 2272.14 | +3              | 455-473                    |
| (K)GKAADIPDSSLWENPDSAQAnGIDSVLSR(A)                         | 1005.48 | 3013.43 | +3              | 477-505                    |
| (K)AADIPDSSLWENPDSAQANGIDSVLSRAEIASc<br>SYEAR(Q)            | 1355.96 | 4064.86 | +3              | 479-516                    |
| (R)AEIAScSYEARQLGIK(N)                                      | 599.31  | 1794.89 | +3              | 506-521                    |
| (R)AEIAScSYEARQLGIK(N)                                      | 643.31  | 1926.92 | +3              | 506-521                    |
| (R)QLGIKnGMFFGHAK(Q)                                        | 516.94  | 1547.79 | +3              | 517-530                    |
| (K)NGMFFGHAK(Q)                                             | 504.74  | 1007.46 | +2              | 522-530                    |
| (K)QLcPNLQAVPYDFHAYK(E)                                     | 1032.50 | 2062.99 | +2              | 531-547                    |
| (K)LTPDEFANAVR(M)                                           | 616.82  | 1231.62 | +2              | 585-595                    |
| (R)MEIKDQTK(C)                                              | 496.76  | 991.50  | +2              | 596-603                    |
| (K)cAASVGIGSNILLAR(M)                                       | 751.41  | 1500.81 | +2              | 604-618                    |
| (K)cAASVGIGSNILLARmATR(K)                                   | 703.69  | 2108.05 | +3              | 604-622                    |
| (R)KAKPDGQYHLKPEEVDDFIR(G)                                  | 597.06  | 2384.21 | +4              | 623-642                    |
| (K)AKPDGQYHLKPEEVDDFIR(G)                                   | 565.04  | 2256.12 | +4              | 624-642                    |
| (R)GQLVTNLPVGvGHSmESK(L)                                    | 885.45  | 1768.88 | +2              | 643-659                    |
| (R)GQLVTNLPVGvGHSmESKLASLGI<br>K(T)                         | 818.11  | 2451.32 | +3              | 643-666                    |
| (K)LASLGIKTCGDLQYMTmAK(L)                                   | 706.35  | 2116.04 | +3              | 660-678                    |
| (K)TCGDLQYmTMAK(L)                                          | 717.81  | 1433.60 | +2              | 667-678                    |
| (K)LQKEFGPKTGQmLYR(F)                                       | 453.74  | 1810.94 | +4              | 679-686                    |
| (K)TGQmLYRfR(G)                                             | 493.89  | 1478.64 | +3              | 687-696                    |
| (K)TGQmLYRfR(G)                                             | 488.56  | 1462.65 | +3              | 687-696                    |
| (R)GLDDRPVrTEK(E)                                           | 709.36  | 1416.70 | +2              | 697-707                    |
| (R)GLDDRPVRTEKER(K)                                         | 785.92  | 1569.82 | +2              | 697-709                    |
| (K)ERKSVSAEINYGIR(F)                                        | 541.29  | 1620.86 | +3              | 708-721                    |
| (R)KSVSAEINYGIR(F)                                          | 446.25  | 1335.71 | +3              | 710-721                    |
| (K)SVSAEINYGIR(F)                                           | 403.55  | 1207.62 | +3              | 711-721                    |

|                                         |        |         |    |         |
|-----------------------------------------|--------|---------|----|---------|
| (R)FTQPKEAEAFLLSLSEEIQR(R)              | 779.41 | 2335.21 | +3 | 722-741 |
| (K)EAEAFLLSLSEEIQR(R)                   | 867.95 | 1733.88 | +2 | 727-741 |
| (R)RLEATGmKGK(R)                        | 553.80 | 1105.59 | +2 | 742-751 |
| (R)LTLKImVRKPGAPVETAK(F)                | 492.80 | 1967.16 | +4 | 753-770 |
| (K)ImV <b>R</b> KPGAPVETAK(F)           | 548.96 | 1643.87 | +3 | 757-770 |
| (K)ImVRKPGAPVETAK(F)                    | 756.93 | 1511.85 | +2 | 757-770 |
| (R)KPGAPVETAKFGGHGlcDNIAR(T)            | 574.55 | 2294.16 | +4 | 761-782 |
| (K)FGGHGlcDNIAR <b>T</b> VTLDQATDNAK(I) | 677.32 | 2705.25 | +4 | 771-794 |
| (R)TVTLdqATDNAK(I)                      | 639.31 | 1276.61 | +2 | 783-794 |
| (R)TVTLdqATDnAKIIGK(A)                  | 563.64 | 1687.90 | +3 | 783-798 |
| (K)IIGKAmLNMFHTMK(L)                    | 550.96 | 1649.85 | +3 | 795-808 |
| (K)AMLNmFHTmKLNISDMR(G)                 | 695.66 | 2083.97 | +3 | 799-815 |

\* Lowercase 'n' indicates deamidation (+1) of Asn residues, while lowercase 'c' indicates carbamidomethyl modification (+57), and 'm' indicates oxidation (+16) of Met residues.

\*\* Arg residues highlighted in **red** were modified by HPG (+132).

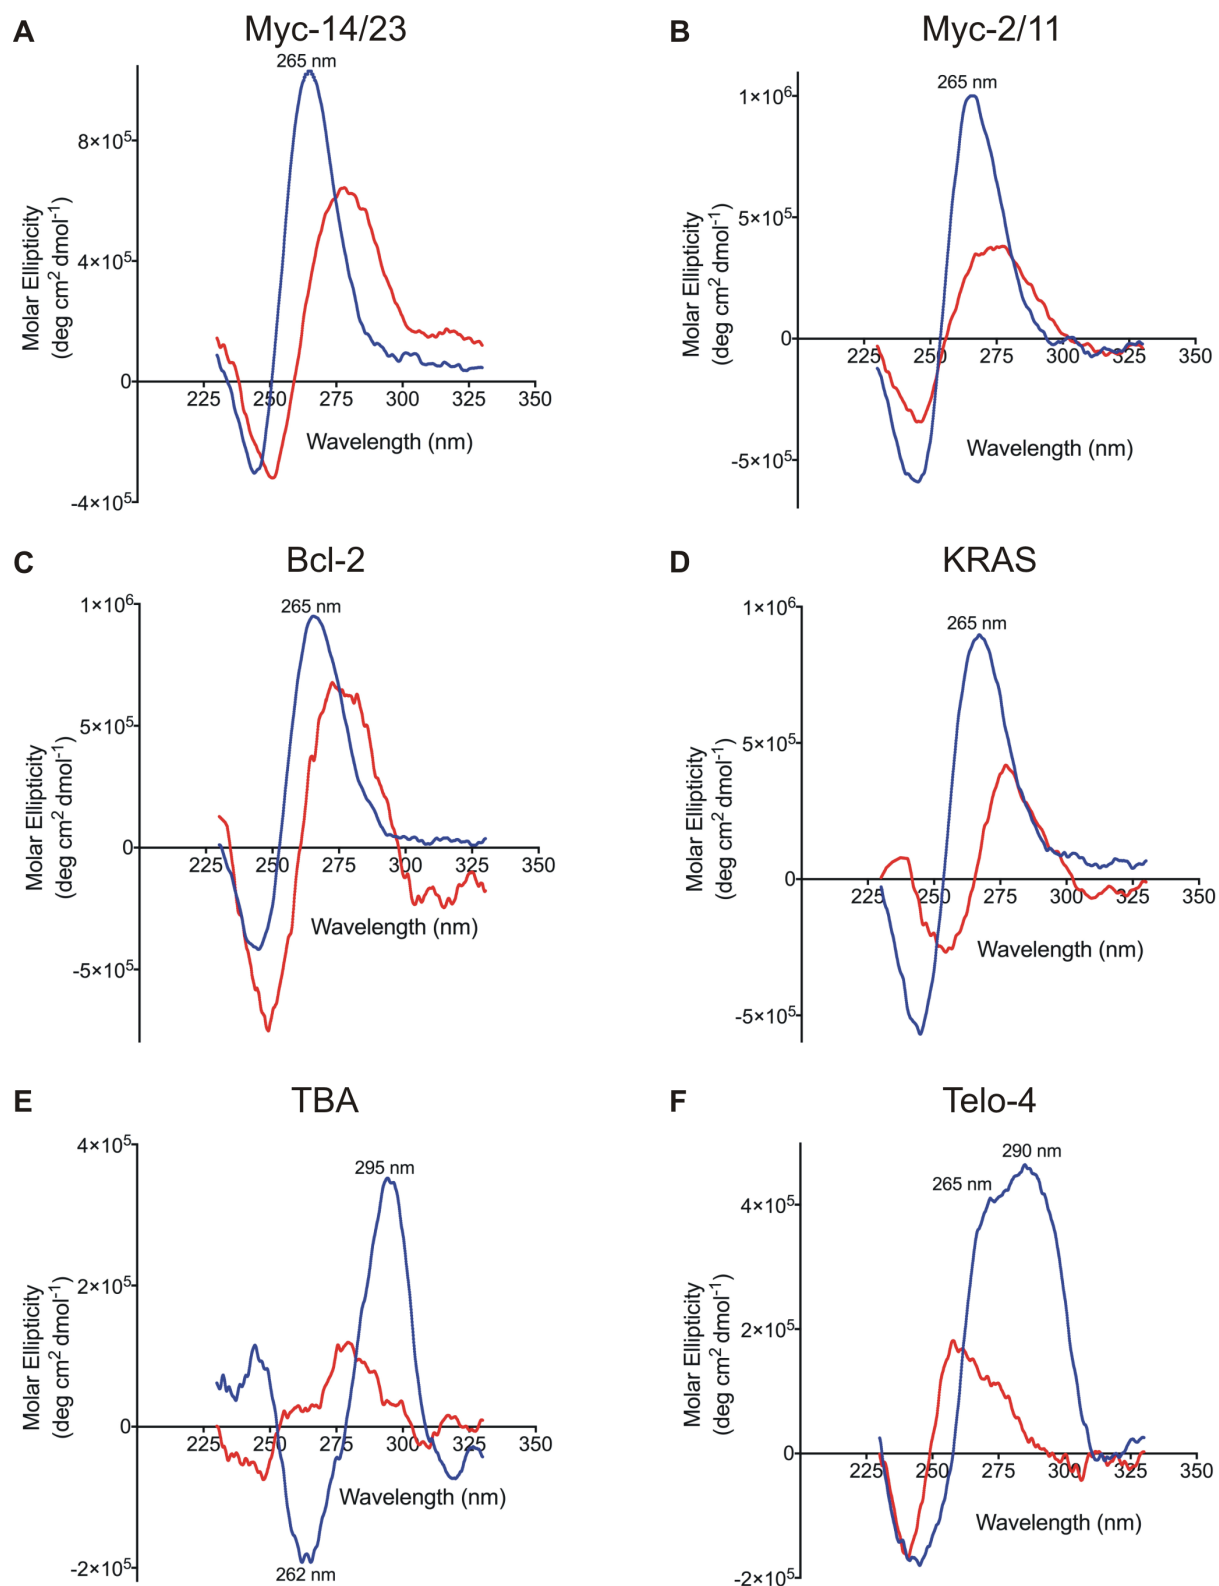

**Figure S1.** Circular dichroism spectra of the ss-DNA oligonucleotides used in this study. Spectra measured in 100 mM KCl are shown in *blue*, while those in 100 mM LiCl are shown in *red*. Positions of signature peaks and troughs for parallel (265 nm), anti-parallel (262 nm and 295 nm) and mixed (265 nm and 290 nm) G4-DNA CD curves are marked.

**A**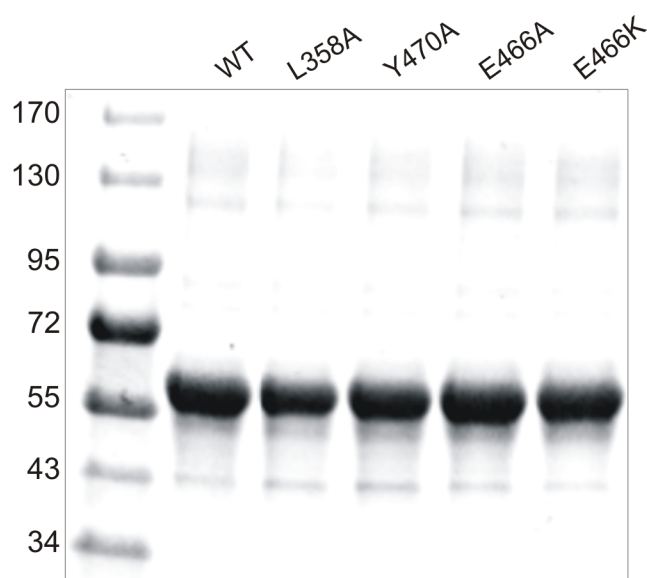**B**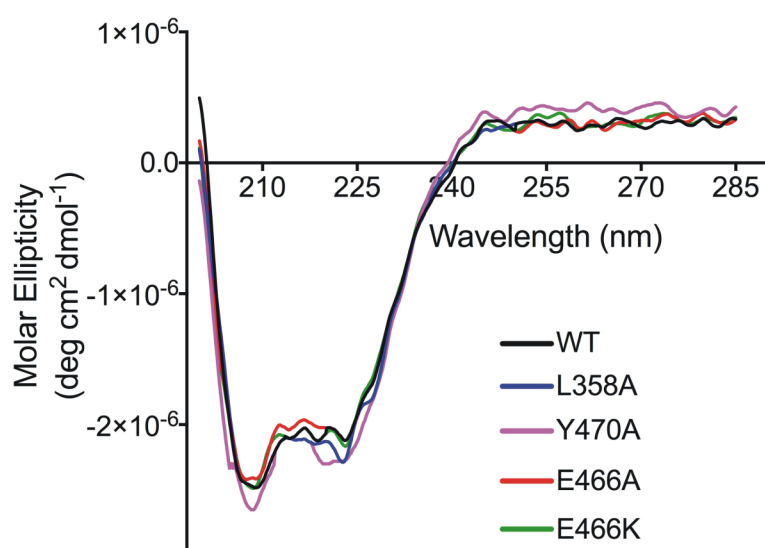

**Figure S2.** hRev1<sup>330-833</sup> wild-type and mutant proteins were overexpressed in *E. coli* BL21 (DE3) cells and purified. **(A)** All the hRev1<sup>330-833</sup> proteins were purified to homogeneity. A Coomassie brilliant blue R-250 stained SDS-PAGE gel with 10  $\mu$ g of each protein is shown. **(B)** CD spectra of the purified hRev1<sup>330-833</sup> proteins are shown. The spectra of all proteins overlapped, indicative of similar folding for the wild-type and mutant proteins.

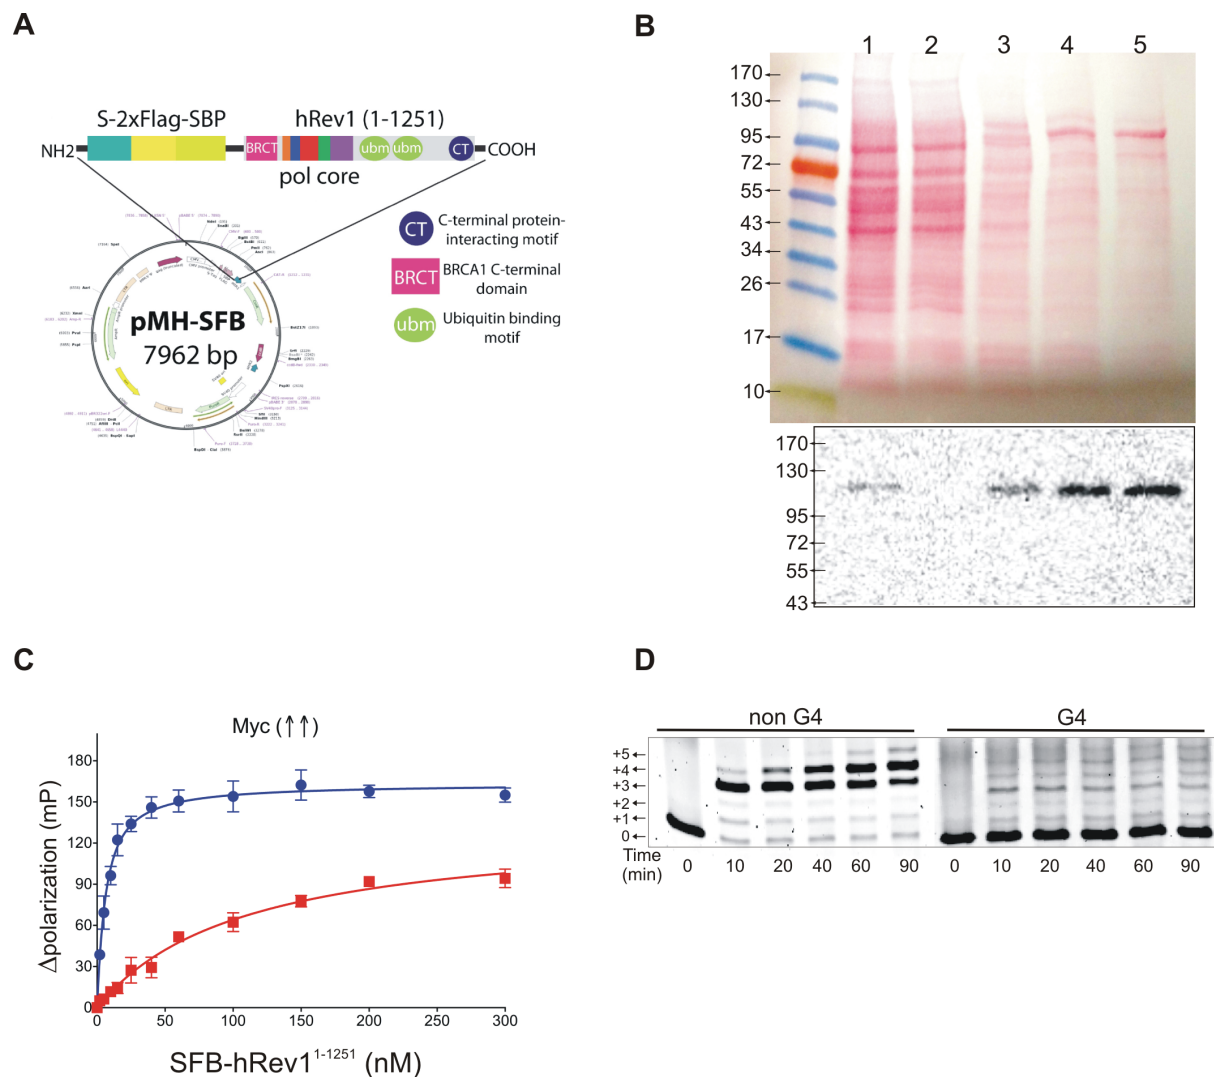

**Figure S3.** Full-length hRev1 was used in *supF*-forward mutagenesis assay and biochemical experiments. **(A)** Full-length hRev1 (a.a. 1-1251) was cloned into the Gateway-compatible pMH-SFB mammalian expression vector as a N-terminal tandem S protein-FLAG-streptavidin-Binding peptide (SFB) tagged construct. The domain organization of the construct is shown, where the affinity tag and hRev1 domains are labeled. *S*, S-protein; *2xFLAG*, two tandem FLAG-peptide sequences; *SBP*, streptavidin-binding peptide; *BRCT*, BRCA1 C terminus domain; *pol core*, hRev1 polymerase core domain (a.a. 330-833) colored according to the scheme identical to that used in **Figure 2C** to show the sub-domains; *ubm*, ubiquitin-binding motif; *CT*, C-terminal domain (a.a. 1150-1251). This plasmid was used to transfect HAP-1 mammalian cells for the forward mutagenesis assay. All the mutant hRev1 constructs described in the mutagenic assay were subsequently made using this construct. **(B)** HEK293T cells stably expressing SFB-tagged hRev1<sup>1-1251</sup> were generated using the construct described in **A**, and the overexpressed protein was purified using affinity chromatography with

streptavidin-sepharose beads. Aliquots from different stages of the protein purification protocol were separated using SDS-PAGE gel electrophoresis. *Lane 1*, Lysate from the HEK293T cells; *lane 2*, supernatant after interaction with streptavidin-sepharose beads; *lane 3*, first eluate with 2 mg/mL biotin; *lane 4*, biotin eluate after second round of binding; *lane 5*, final dialyzed sample. A major band at ~120 kDa was observed for the purified protein. Molecular weight markers are shown in the far-left lane. The panel below the Ponceau-stained blot shows the western blot probed with an anti-FLAG antibody. A single band was detected for SFB-hRev1 at different stages of purification. (C) DNA binding properties of the purified hRev1<sup>1-1251</sup> protein were studied using the Myc 14/23 substrate. Binding curves for the Myc 14/23 G4 substrate (*blue*) and the non-G4 control (*red*) are shown. The values for the equilibrium dissociation constants are given in **Table 2**. (D) Enzyme activity on both G4- and non-G4 template-primer substrates was tested for the purified hRev1<sup>1-1251</sup> protein, in an assay as described in Methods and **Figure 4**.

## pSP189 with *supF*

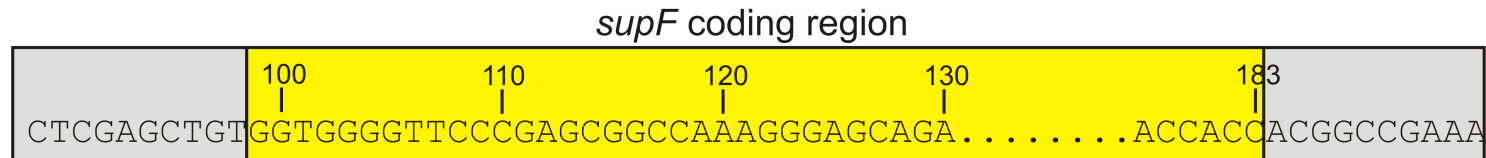

## pSP189 with *supF*

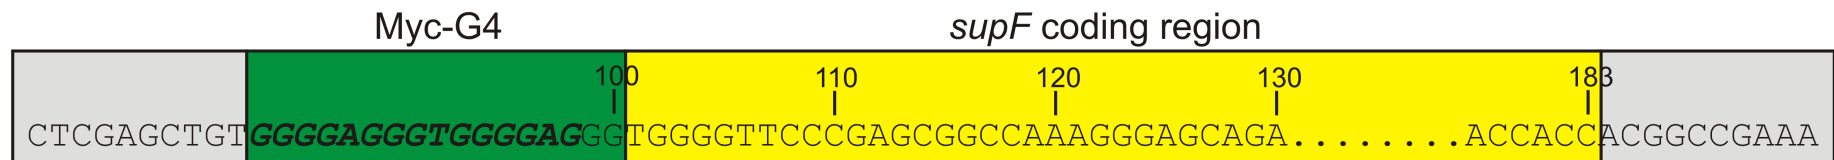

**Figure S4.** Schematic showing the DNA sequence of the pSP189 plasmids used in the forward mutagenesis assay. The unmodified pSP189 plasmid sequence is shown in the top panel, with the *supF*-tRNA coding region marked in *yellow*. The numbering is according to Seidman *et al* (1). In the lower panel, the region marked in *green* indicates the Myc-G4 sequence inserted into the pSP189 plasmid. The color scheme is identical to that used in Figure 6.

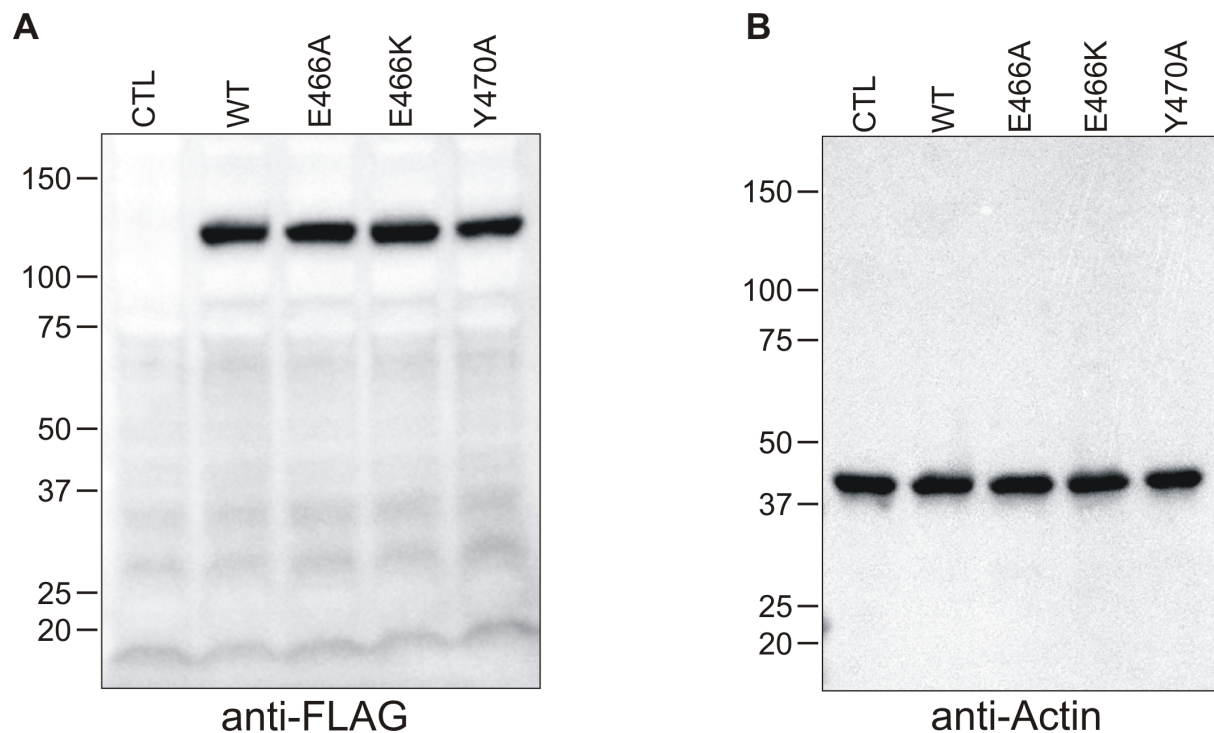

**Figure S5.** Uncropped Western immunoblots of whole-cell lysates from HAP-1 *REV1*<sup>KO</sup> cells transiently transfected with the pMH-SFB-Rev1 plasmids. The HAP-1 *REV1*<sup>KO</sup> cells were transiently transfected with different constructs of the pMH-SFB-Rev1 plasmid, expressing the wild-type, or mutant form of hRev1, and these were used in the complementation experiments in the supF forward mutagenesis assay. Cropped versions of these blots are shown in Figure 5A. **(A)** The immunoblot was probed with a rabbit anti-FLAG tag polyclonal primary antibody (Novus Biologicals Cat# NB600-345; 1:1000 [v/v] dilution), to detect the level of protein expression for each of the SFB-tagged hRev1 proteins as indicated above each lane. **(B)** The immunoblot described in A was probed with a rhodamine-conjugated anti-actin loading control antibody FAB (Bio-Rad Cat#12004164; 1:2000 [v/v] dilution).

## HAP-1 No PDS

|           |                                                                                                 |
|-----------|-------------------------------------------------------------------------------------------------|
| G4_supF   | GAATTCGAGAGCCCTGCTCGAGCTGTGGGGAGGGTGGGGAGGGTGGGGTTCCCGAGCGGCCAAAGGGAGCAGACTCTAAATCTGCCGTCATCGAC |
| No-PDS_1  | GAATTCGAGAGCCCTGCTCGAGCTGTGGGGAGGGTAGGGAGGATGGGGTTCCCGAGCGGTCAAAGGTAGCAGACTCTAAATCTGCCGTCATCGAC |
| No-PDS_2  | GAATTCGAGAGCCCTGCTCGAGCTGTGCGGAGGGTGGGGAGGGTGGGGTTCCCTAGCGGCCA-AGTGAGGAGACTCTAAATCTGCCGTCATCGAC |
| No-PDS_3  | GAATTCGAGAGCCCTGCTCGAGCTGTGTGGAGGGTGGGGAGGGTGGGGTTCCCGAGCGGCCAAAGTTAGCAGACTCTAAATCTGCCGTCATCGAC |
| No-PDS_4  | GAATTCGAGAGCCCTGCTCGAGCTGTGCGGAGGGTGGGGAGGGTGGGGTTCCCTAGCGGTCAAAGGTAGCAGACTCTAAATCTGCCGTCATCGAC |
| No-PDS_5  | GAATTCGAGAGCCCTGCTCGAGCTGTGTGGAGGGTGGGGAGGGTGGGGTTCCCGAGCGGCCA-AGTGAGGAGACTCTAAATCTGCCGTCATCGAC |
| No-PDS_6  | GAATTCGAGAGCCCTGCTCGAGCTGTGGGGAGGGTAGGGAGGATGGGGTTCCCGAGCGGCCAAAGTTAGCAGACTCTAAATCTGCCGTCATCGAC |
| No-PDS_7  | GAATTCGAGAGCCCTGCTCGAGCTGTGCGGAGGGTGGGGAGGGTGGGGTTCCCTAGCGGCCA-AGTGAGGAGACTCTAAATCTGCCGTCATCGAC |
| No-PDS_8  | GAATTCGAGAGCCCTGCTCGAGCTGTGTGGAGGGTGGGGAGGGTGGGGTTCCCGAGCGGCCAAAGTTAGCAGACTCTAAATCTGCCGTCATCGAC |
| No-PDS_9  | GAATTCGAGAGCCCTGCTCGAGCTGTGCGGAGGGTGGGGAGGGTGGGGTTCCCTAGCGGTCAAAGGTAGCAGACTCTAAATCTGCCGTCATCGAC |
| No-PDS_10 | GAATTCGAGAGCCCTGCTCGAGCTGTGTGGAGGGTGGGGAGGGTGGGGTTCCCGAGCGGCCA-AGTGAGGAGACTCTAAATCTGCCGTCATCGAC |
|           | *****                                                                                           |

  

|           |                                                                 |
|-----------|-----------------------------------------------------------------|
| G4_supF   | TTCGAAGGTTTCGAATCCTTCCCCCACCACCACGGCCGAAATTCGGTACCCGGATCCTTAGC  |
| No-PDS_1  | TTCGGAGGTTCTAATCCTTCCCCCACCACCACGGCCGAAATTCGGTACCCGGATCCTTAGC   |
| No-PDS_2  | TTCGAAGATTTCGATTTCCTTCCCCCACCACCACGGCCGAAATTCGTACCCGGATCCTTAGC  |
| No-PDS_3  | -TTCGAAGGTTTCGAATCCTTCCCCCACCACCACGGCCGAAATTCGGTACCCGGATCCTTAGC |
| No-PDS_4  | TTCGGAGGTTCTAATCCTTCCCCCACCACCACGGCCGAAATTCGTACCCGGATCCTTAGC    |
| No-PDS_5  | TTCGAAGATTTCGATTTCCTTCCCCCACCACCACGGCCGAAATTCGTACCCGGATCCTTAGC  |
| No-PDS_6  | -TTCGAAGGTTTCGAATCCTTCCCCCACCACCACGGCCGAAATTCGGTACCCGGATCCTTAGC |
| No-PDS_7  | TTCGAAGATTTCGATTTCCTTCCCCCACCACCACGGCCGAAATTCGTACCCGGATCCTTAGC  |
| No-PDS_8  | -TTCGAAGGTTTCGAATCCTTCCCCCACCACCACGGCCGAAATTCGGTACCCGGATCCTTAGC |
| No-PDS_9  | TTCGGAGGTTCTAATCCTTCCCCCACCACCACGGCCGAAATTCGTACCCGGATCCTTAGC    |
| No-PDS_10 | TTCGAAGATTTCGATTTCCTTCCCCCACCACCACGGCCGAAATTCGGTACCCGGATCCTTAGC |
|           | *** ** *                                                        |

## HAP-1 0.5 $\mu$ M PDS

```

G4_SupF      GAATTCGAGAGCCCTGCTCGAGCTGTGGGGAGGGTGGGGAGGGTGGGGTTCCCGAGCGGCCAAAGGGAGCAGACTCTAAATCTGCCGTCATCGAC
0.5-PDS_1    GAATTCGAGAGCCCTGCTCGAGCTGTGGGGAGGGTGGGAAGGGTGGGGT-CCCGATCGGCCAAAGGGATCAGACTCTA-ATCTGCCGTCATCGTC
0.5-PDS_2    GAATTCTAGAGCCCTGCTCGAGCTGTGGGGAGGGCTGGGTAGGGTGGGGTTCCCGAGCGGCCAAAGGTGAGAAGACTCTAAATCTGCCGTCATCGAC
0.5-PDS_3    GAATTCGATAGCCCTGCTCGAGCTGTGGGAAGGGTGGGGAGGGTGGGGTTCCCGAGCGGCCAAAGGTAGCAGACTCTAAATCTGC--TCATCGAC
0.5-PDS_4    GAATTCGAGAGCCCTGCTCGAGCTGTGGGGAGGGTGGGAAGGGTGGGGT-CCCGATCGGCCAAAGGGATCAGACTCTA-ATCTGCCGTCATCGTC
0.5-PDS_5    GAATTCTAGAGCCCTGCTCGAGCTGTGGGGAGGGCTGGGTAGGGTGGGGTTCCCGAGCGGCCAAAGGTGAGAAGACTCTAAATCTGCCGTCATCGAC
0.5-PDS_6    GAATTCGATAGCCCTGCTCGAGCTGTGGGAAGGGTGGGGAGGGTGGGGTTCCCGAGCGGCCAAAGGTAGCAGACTCTAAATCTGC--TCATCGAC
0.5-PDS_7    GAATTCGATAGCCCTGCTCGAGCTGTGGGAAGGGTGGGGAGGGTGGGGTTCCCGAGCGGCCAAAGGGATCAGACTCTA-ATCTGCCGTCATCGTC
0.5-PDS_8    GAATTCGAGAGCCCTGCTCGAGCTGTGGGGAGGGTGGGAAGGGTGGGG-TCCCGATCGGCCAAAGGTGAGAAGACTCTAAATCTGCCGTCATCGAC
0.5-PDS_9    GAATTCTAGAGCCCTGCTCGAGCTGTGGGGAGGGCTGGGTAGGGTGGGGTTCCCGAGCGGCCAAAGGTAGCAGACTCTAAATCTGC--TCATCGAC
0.5-PDS_10   GAATTCGATAGCCCTGCTCGAGCTGTGGGAAGGGTGGGGAGGGTGGGGTTCCCGAGCGGCCAAAGGGATCAGACTCTA-ATCTGCCGTCATCGTC
***** * *****

```

  

```

G4_SupF      TTCGAAGGTTTGAATCCTTCCCCACCACCAACCGGCCGAAATTCGGTACCCGGATCCTTAGC
0.5-PDS_1    TTCGAAGGTTTGAATCCTTCCCCACCACCACGGCCGAAATTCGTTACCCGGATCCTTAGC
0.5-PDS_2    --CGAAGGTTTGAACCTTCCCCCAT-ACCACGGCCGAAATTCGGTACCCGGATCCTTAGC
0.5-PDS_3    TTCGAAGGTTTGAATCCTTCCCCACCTCCACGGCCGAAATTAGGTACCCGGATCCTTAGC
0.5-PDS_4    TTCGAAGGTTTGAATCCTTCCCCACCACCACGGCCGAAATTCGTTACCCGGATCCTTAGC
0.5-PDS_5    --CGAAGGTTTGAACCTTCCCCCAT-ACCACGGCCGAAATTCGGTACCCGGATCCTTAGC
0.5-PDS_6    TTCGAAGGTTTGAATCCTTCCCCACCTCCACGGCCGAAATTAGGTACCCGGATCCTTAGC
0.5-PDS_7    TTCGAAGGTTTGAATCCTTCCCCACCACCACGGCCGAAATTCGTTACCCGGATCCTTAGC
0.5-PDS_8    --CGAAGGTTTGAACCTTCCCCCAT-ACCACGGCCGAAATTCGGTACCCGGATCCTTAGC
0.5-PDS_9    TTCGAAGGTTTGAATCCTTCCCCACCACCACGGCCGAAATTCGTTACCCGGATCCTTAGC
0.5-PDS_10   TTCGAAGGTTTGAATCCTTCCCCCA-TACCACGGCCGAAATTCGGTACCCGGATCCTTAGC
*****

```

**Figure S6.** Alignment of the G4-*supF* plasmid sequences obtained from white MBM7070 *E. coli* colonies. These plasmids were first allowed to replicate in HAP-1 cells grown in the presence or absence of 0.5  $\mu$ M PDS. After extracting these plasmids from the HAP-1 cells, they were used to transform the bacterial indicator strain as described in Methods. The top sequence is for the parent G4-*supF* plasmid (before transfection into HAP-1 cells), while lower sequences were obtained from the white-colony transfectants. Ten colonies per condition were used for sequencing.

The positions of conserved/unmutated bases (in all the ten sequences) are marked by asterisks, while deletions are marked by dashes in each sequence. The shading/coloring of the unmodified G4-*supF* sequence marks the zones I to IV as mentioned in **Figure 6** of the manuscript.

**HAP-1 *REV1*<sup>KO</sup> No PDS**

|           |                                                     |                                              |
|-----------|-----------------------------------------------------|----------------------------------------------|
| G4_SupF   | GAATTCGAGAGCCCTGCTCGAGCTGTGGGGAGGGTGGGGAGGGTGGGGTTC | CCGAGCGGCCAAAGGGAGCAGACTCTAAATCTGCCGTATCGAC  |
| No-PDS_1  | CAATTCGAGAGCCCTGCTCGAGCTGTGAGGAGCGTGGGGAGGGTGGGGTTC | CCGAACGGCCAAATGGAGCAGACTCTAAACT-CCGTATCGAC   |
| No-PDS_2  | CAATTCGAGAGCCCAGCTCGAGCTGTTGGGAGGGTGTGGAGGGTGGGGTTC | --AGCGCCAAG---GTCAGACTCTAAATCT-GCCGTATCGAC   |
| No-PDS_3  | GAATTCTAGAG--CTGCTCGAGCTGTGGGGAGTGTGGGGAGGGTTTGTTTC | CCGAGCGGCCAAAAGTAGCAGACTCTAAATCT--CGTCATCGAC |
| No-PDS_4  | CAATTCGAGAGCCCTGCTCGAGCTGTGAGGAGCGTGGGGAGGGTGGGGTTC | CCGAACGGCCAAGG---TCAGACTCTAAATCTGCCGT-ATCGAC |
| No-PDS_5  | CAATTCGAGAGCCCAGCTCGAGCTGTTGGGAGGGTGTGGAGGGTGGGGTTC | --AGCGCCAATGGAGCAGACTCTAAACT-CCGTATCGAC      |
| No-PDS_6  | GAATTCTAGAG--CTGCTCGAGCTGTGGGGAGTGTGGGGAGGGTTTGTTTC | CCGAGCGGCCAAGGT---CAGACTCTAAATCTGCCGT-ATCGAC |
| No-PDS_7  | CAATTCGAGAGCCCAGCTCGAGCTGTTGGGAGGGTGTGGAGGGTGGGGTTC | --AGCGCCAAGTAGCAGACTCTAAATCT-C-GTCATCGAC     |
| No-PDS_8  | GAATTCTAGAG--CTGCTCGAGCTGTGGGGAGTGTGGGGAGGGTTTGTTTC | CCGAGCGGCCAAGGT---CAGACTCTAAATCTGCCGT-ATCGAC |
| No-PDS_9  | CAATTCGAGAGCCCTGCTCGAGCTGTGAGGAGCGTGGGGAGGGTGGGGTTC | CCGAACGGCCAAGG---TCAGACTCTAAATCTGCCGT-ATCGAC |
| No-PDS_10 | CAATTCGAGAGCCCAGCTCGAGCTGTTGGGAGGGTGTGGAGGGTGGGGTTC | --AGCGCCAAGTAGCAGACTCTAAATCT-C-GTCATCGAC     |
|           | *****                                               | *****                                        |

|           |                                   |                                |
|-----------|-----------------------------------|--------------------------------|
| G4_SupF   | TTCGAAGGTTCGAATCCTTCCCCCACCACCA   | CGGCCGAAATTCGGTACCCGGATCCTTAGC |
| No-PDS_1  | TT--AGGTTTCGAATCCTTCCCCCATCACCAC  | CGGCCGAAATTCGGTACCCGAATCCTTAGC |
| No-PDS_2  | TTCG-AGGTTTCGAATCCTTCACCCACCACCAC | CGGCCGAAATTCAGTACCCGGATCCTTAGC |
| No-PDS_3  | TTCGTAGGTTTCGAATCTTTCCCCCACTACCAC | CGGCCGAAATTCGATACCCGGATCCTTA-- |
| No-PDS_4  | TTCG-AGGTTTCGAATCCTTCACCCATCACCAC | CGGCCGAAATTCGGTACCCGAATCCTTAGC |
| No-PDS_5  | TT--AGGTTTCGAATCCTTCCCCCACCACCAC  | CGGCCGAAATTCAGTACCCGGATCCTTAGC |
| No-PDS_6  | TTCG-AGGTTTCGAATCCTTCACCCCTACCAC  | CGGCCGAAATTCGATACCCGGATCCTTA-- |
| No-PDS_7  | TTCGTAGGTTTCGAATCTTTCCCCCACCACCAC | CGGCCGAAATTCAGTACCCGGATCCTTAGC |
| No-PDS_8  | TTCG-AGGTTTCGAATCCTTCACCCCTACCAC  | CGGCCGAAATTCGATACCCGGATCCTTA-- |
| No-PDS_9  | TTCG-AGGTTTCGAATCCTTCACCCATCACCAC | CGGCCGAAATTCGGTACCCGAATCCTTAGC |
| No-PDS_10 | TTCGTAGGTTTCGAATCTTTCCCCCACCACCAC | CGGCCGAAATTCAGTACCCGGATCCTTAGC |
|           | ** ****                           | ** ****                        |

## HAP-1 *REV1*<sup>KO</sup> 0.5 $\mu$ M PDS

|            |                                                                                                                                                                                                                                                                              |
|------------|------------------------------------------------------------------------------------------------------------------------------------------------------------------------------------------------------------------------------------------------------------------------------|
| G4_SupF    | GAATTCGAGAGCCCTGCTCGAGCTGTGGGAGGGTGGGGAGGGTGGGGTTCCCGAGCGGCCAAAGGGAGCAGACTCTAAATCTGCCGTCATCGAC                                                                                                                                                                               |
| 0.5-PDS_1  | GAA-TCGAGAGCCCTGCTCGAGCTGTGGAGAGGGTGGGGAGGGTGGAGTCCCAA---GGCCATG---GAGGACTC--AATCTGTCGTCTTCGAC                                                                                                                                                                               |
| 0.5-PDS_2  | AAATTCTAGAGCCCCGCTCGAGCTGTGAGGAGTGTGGGGAGGGTGGAGTCCCTGAGCGGC---TGGAGCAGACTCTAAATCTGCCGTCATCGAC                                                                                                                                                                               |
| 0.5-PDS_3  | AAATTCGAGAGCCCTGCTCGAGCTGTAGGGAGGGTGGGGAGGGTAGCGTTCCTGAGCGGCCAAATGGAGCAGACTCTAAACCTGCCGTC---GAC                                                                                                                                                                              |
| 0.5-PDS_4  | GAA-TCGAGAGCCCTGCTCGAGCTGTGGAGAGGGTGGGGAGGGTGGAGTCCCAA---GGCCATG---GAGGACTC--AATCTGTCGTCTTCGAC                                                                                                                                                                               |
| 0.5-PDS_5  | AAATTCTAGAGCCCCGCTCGAGCTGTGAGGAGTGTGGGGAGGGTGGAGTCCCTGAGCGGC---TGGAGCAGACTCTAAATCTGCCGTCATCGAC                                                                                                                                                                               |
| 0.5-PDS_6  | AAATTCGAGAGCCCTGCTCGAGCTGTAGGGAGGGTGGGGAGGGTAGCGTTCCTGAGCGGCCATG---GAGGACTC--AATCTGTCGTCTTCGAC                                                                                                                                                                               |
| 0.5-PDS_7  | AAATTCGAGAGCCCTGCTCGAGCTGTAGGGAGGGTGGGGAGGGTAGCGTTCCTGAGCGGC---TGGAGCAGACTCTAAATCTGCCGTCATCGAC                                                                                                                                                                               |
| 0.5-PDS_8  | GAA-TCGAGAGCCCTGCTCGAGCTGTGGAGAGGGTGGGGAGGGTGGAGTCCCAA---GGCCAAATGGAGCAGACTCTAAACCTGCCG---TCGAC                                                                                                                                                                              |
| 0.5-PDS_9  | AAATTCTAGAGCCCCGCTCGAGCTGTGAGGAGTGTGGGGAGGGTGGAGTCCCTGAGCGGCCATG---GAGGACTC--AATCTGTCGTCTTCGAC                                                                                                                                                                               |
| 0.5-PDS_10 | AAATTCGAGAGCCCTGCTCGAGCTGTAGGGAGGGTGGGGAGGGTAGCGTTCCTGAGCGGC---TGGAGCAGACTCTAAATCTGCCGTCATCGAC                                                                                                                                                                               |
|            | <div> <div> **</div> <div> **</div> <div> *****</div> <div> *****</div> <div> ***</div> <div> *****</div> <div> **</div> <div> **</div> <div> ***</div> <div> *</div> <div> *****</div> <div> **</div> <div> ***</div> <div> **</div> <div> ***</div> <div> ***</div> </div> |
| G4_SupF    | TTCTGAAGGTTCTGAATCCTTCCCCCACCACCACGGCCGAAATTCGGTACCCGGATCCTTAGC                                                                                                                                                                                                              |
| 0.5-PDS_1  | TTAA--GGTTT--T--CT---TCCCCACTACGGCCGA-ATTCGATACCTGAATCCTTAGC                                                                                                                                                                                                                 |
| 0.5-PDS_2  | TTCGTAGGTTA--ATCCTTCCC--ACCACTACGGCCGA-ATTCGGAACCCGGATCCTTAGC                                                                                                                                                                                                                |
| 0.5-PDS_3  | TTCG--GGTTC--ATCCTTCCCCA--ACTACGGC-----TTCGGTACCCGTATCCTTAGC                                                                                                                                                                                                                 |
| 0.5-PDS_4  | TTAA--GGTTT--T--CTTCCCCCACCCTACGGCCGA-ATTCGGAACCCGGATCCTTAGC                                                                                                                                                                                                                 |
| 0.5-PDS_5  | TTCGTAGGTTA--ATCCTTCCC---AACTACGGC-----TTCGGTACCCGTATCCTTAGC                                                                                                                                                                                                                 |
| 0.5-PDS_6  | TTAA--GGTTT--T--CTTCCCCCACCCTACGGCCGA-ATTCGGAACCCGGATCCTTAGC                                                                                                                                                                                                                 |
| 0.5-PDS_7  | TTCGTAGGTTA--ATCCTTCC--CA--ACTACGGC-----TTCGGTACCCGTATCCTTAGC                                                                                                                                                                                                                |
| 0.5-PDS_8  | TTCG--GGTTC--ATCCT--TCCCCCACTACGGCCGA-ATTCGATACCTGAATCCTTAGC                                                                                                                                                                                                                 |
| 0.5-PDS_9  | TTAA--GGTTT--T--CTTCCCCCACCCTACGGCCGA-ATTCGGAACCCGGATCCTTAGC                                                                                                                                                                                                                 |
| 0.5-PDS_10 | TTCGTAGGTTA--ATCCTTCC--CA--ACTACGGC-----TTCGGTACCCGTATCCTTAGC                                                                                                                                                                                                                |
|            | <div> <div> **</div> <div> ****</div> <div> **</div> <div> **</div> <div> *****</div> <div> ****</div> <div> ***</div> <div> *</div> <div> *****</div> </div>                                                                                                                |

**Figure S7.** Alignment of the G4-*supF* plasmid sequences obtained from white MBM7070 *E. coli* colonies. These plasmids were first allowed to replicate in HAP-1 *REV1*<sup>KO</sup> cells grown in the presence or absence of 0.5  $\mu$ M PDS.

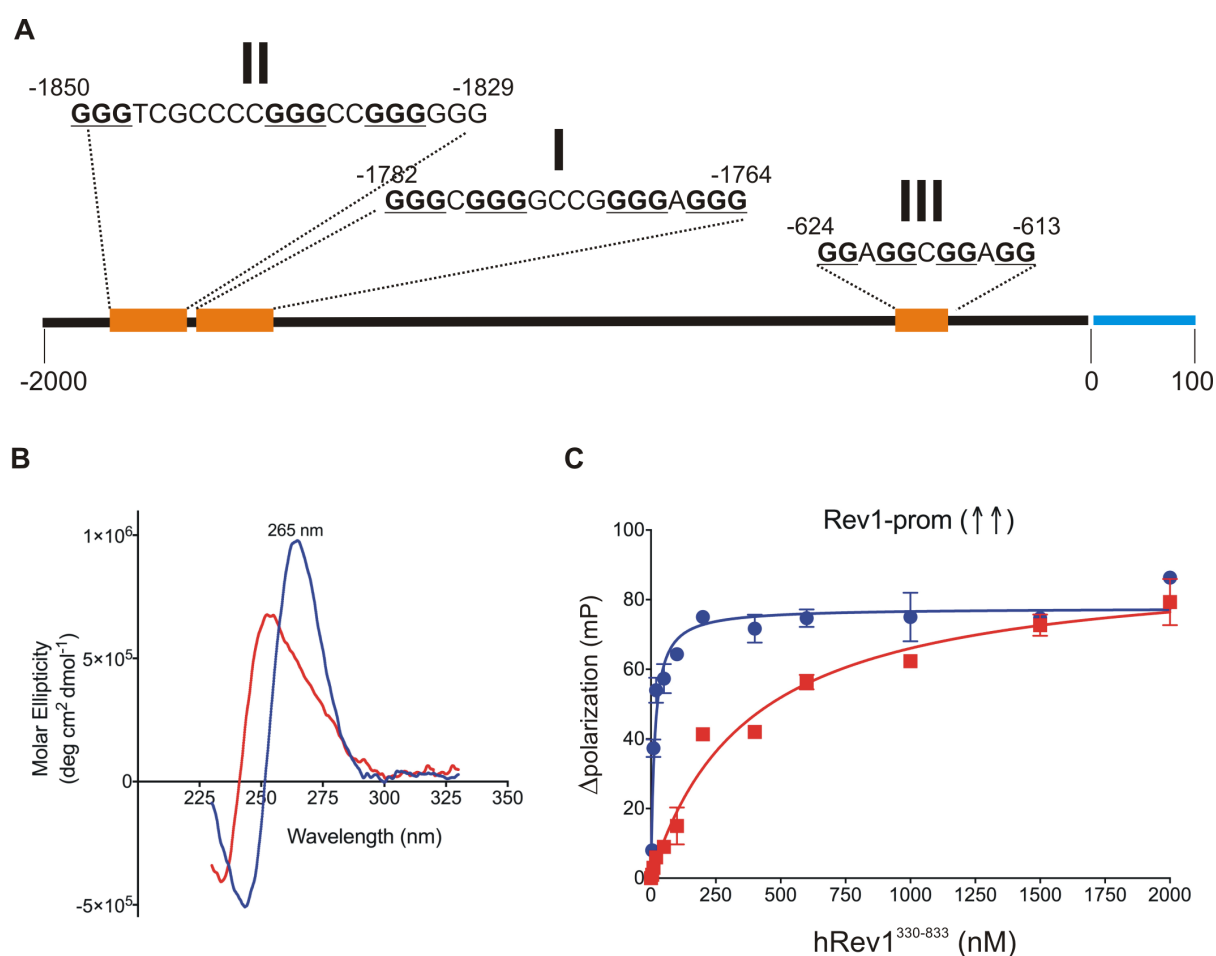

**Figure S8.** A putative G4-forming sequence was identified at the *REV1* promoter. The human *REV1* gene is located on chromosome 2 (2q11.2; 99490201-99490218 on the negative strand). **(A)** Cartoon schematic showing the region spanning -2000 to +100 bp at the *REV1* gene locus. The transcription start site (marked by position '0') is indicated, as well as the region +100 bp into the coding region (blue). DNA sequence was retrieved from the Eukaryotic promoter database and the G4-forming prediction was done by analyzing the sequence using the G4-prediction tool on the QGRS web server. The three top-scoring sequences (based on G-score>20) are marked as I (G-score = 42), II (G-score = 35) and III (G-score = 21) respectively, and the DNA sequences are shown, with the guanine bases involved in putative quadruplex formation marked in bold and underlined. Sequence 'I' was used for designing the Rev1-prom oligonucleotide used in this study. The position of each sequence is marked by the numbers on the 5'- and 3'-end. **(B)** Circular dichroism spectra of the Rev1-prom sequence (**Table 1** in main text) were measured in buffer containing 100 mM KCl (blue curve) or 100 mM LiCl (red curve). The position of the signature peak at 265 nm for parallel

G4-form is indicated. (C) Binding affinity for Rev1-prom G4 (*blue*) and nonG4 (*red*) DNA was measured for the wild-type hRev1<sup>330-833</sup> protein as indicated. The measured values are listed in **Table 3** of main text. Reported values represent the mean  $\pm$  SD (n=3).

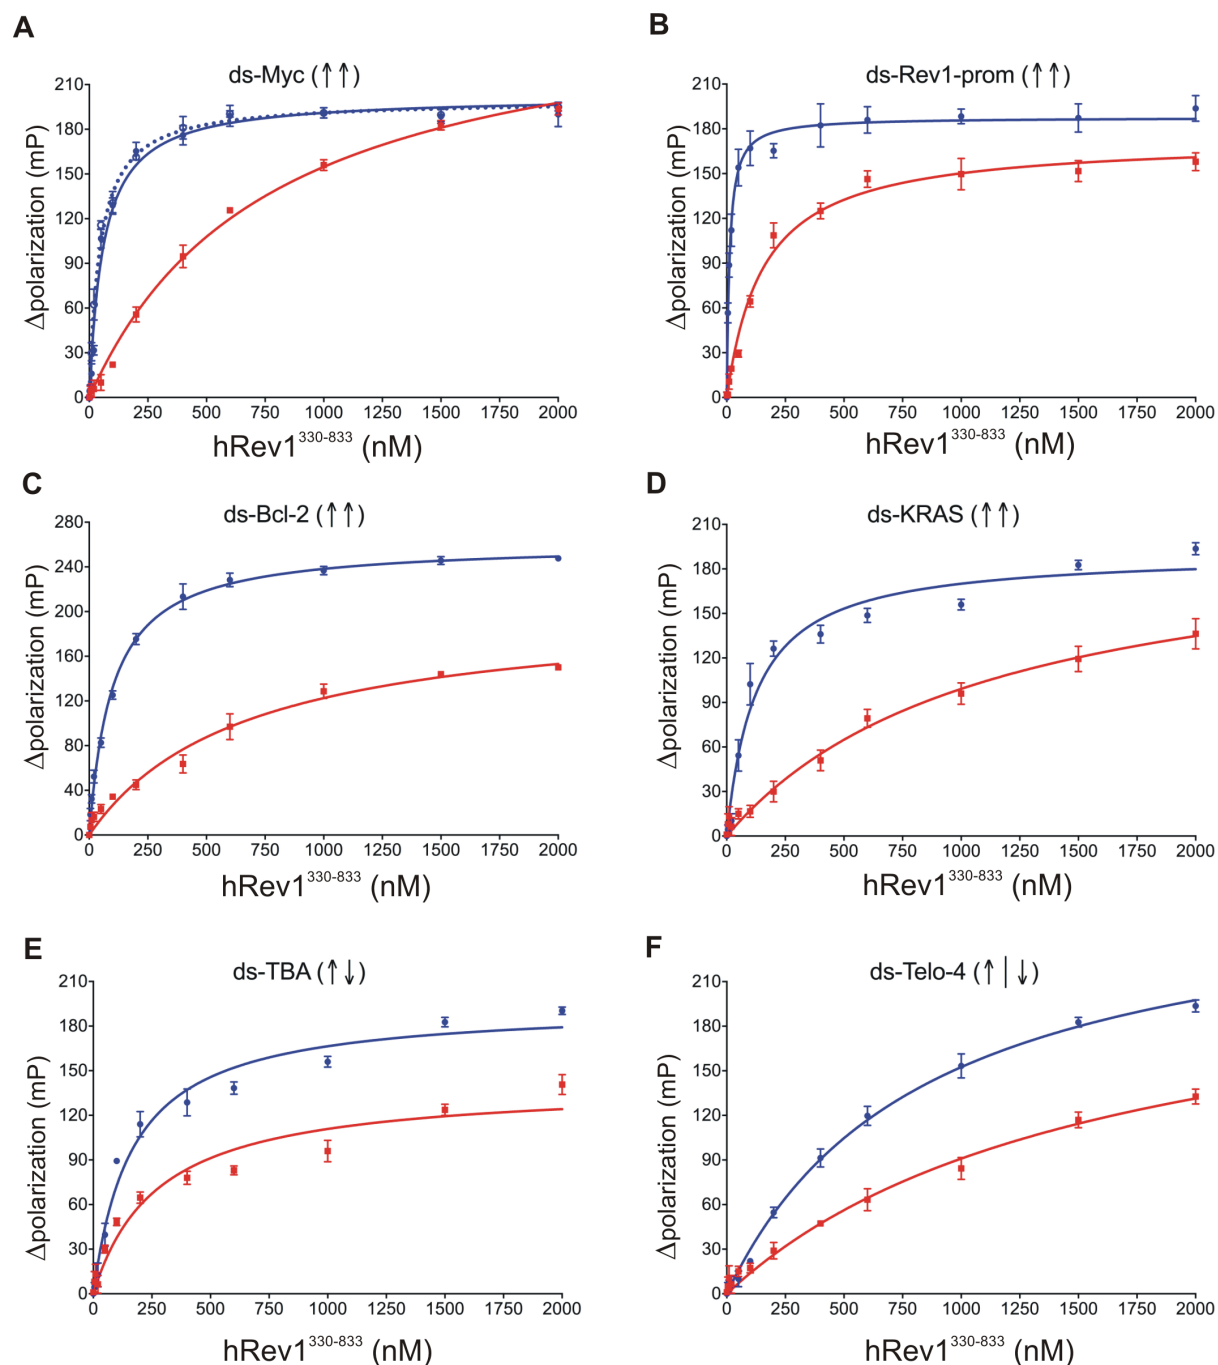

**Figure S9.** Binding affinity of hRev1<sup>330-833</sup> to primer-template G4 DNA substrates. Oligonucleotides forming the different types of G4 DNA folds (described in main text and **Table 1**) were annealed to a common 11-mer primer to obtain primer-template substrates. The hRev1<sup>330-833</sup> protein was then titrated into a solution containing each of these ds-G4-DNA (blue) or ds-non-G4-DNA (red) substrates at 1 nM in a buffer containing 100 mM KCl. The range of concentrations for the protein is indicated on the X-axis. The change in fluorescence polarization at each concentration was measured and plotted as a function of the protein concentration. (A-F) Binding curves for hRev1<sup>330-833</sup> core protein with the indicated G4 DNA

substrate. In panel **A**, the binding curve for Myc-14/23 is shown as a solid *blue* line (full circles), while that for Myc-2/11 is shown as a dotted *blue* line (open circles). The G4 fold is indicated by the direction of arrows in parentheses for each panel ( $\uparrow\uparrow$  = parallel G4,  $\uparrow\downarrow$  = anti-parallel G4,  $\uparrow\downarrow$  = hybrid G4). Resulting data were fit to a quadratic equation to yield the binding dissociation constants given in **Table S3**. Reported values represent the mean  $\pm$  SD (n=3).

|               |                                                              |                    |     |
|---------------|--------------------------------------------------------------|--------------------|-----|
| human         | HS--NTKINGAHHSTVQGPSSTKSTSSVSTFSKAAPSVPSKP                   | SDCNFISNFYSHSRLHHI | 361 |
| chimpanzee    | HS--NTKINGAHHSTVQGPSSTKSTSSVSTFSKAAPSVPSKPSDCNFISNFYSHSRLHHI |                    | 361 |
| gorilla       | HS--NTKINGAHHSTVQGPSSTKSTSSVSTFSKAAPSVPSKPSDCNFISNFYSHSRLHHI |                    | 361 |
| rhesus        | HS--NTKINGAHHSTVQGPSSTKSTSSVSTLSKAAPSVPSKPSDCNFISNFYSHSRLHHI |                    | 395 |
| cattle        | HS--NPRVNGAHHSTVQGPSSTKSTSSVSPSPSRGRPSGPPRP                  | SDNFISDFYSRSLHHI   | 361 |
| sheep         | HS--NPRVNGAHHSTVQGPSSTKSTSSVSPSPSRAGPSGPPRP                  | SDCNFISDFYSRSLHHI  | 355 |
| pig           | HS--NTRVNGAHHSTVQGPSSTRSTSSVPMPSKAAPSVPPRP                   | SDCNFISDFYSRSLHHI  | 401 |
| mouse         | HS--NTKINGAHHSTVQGPSSTKSTS-VLTLSKVAPSVPSKPSDCNFISDFYSRSLHHI  |                    | 359 |
| dog           | HS--NTKINGAHHSAVQGPSSTKSTSSVPTLSKAAPLVPSKPSDCNFISDFYSRSLHHI  |                    | 361 |
| cat           | HS--NTKINGAHHSAVQGPSSTKST-SVPALSKAAPSVPSKPSDCNFISDFYSHSRLHHI |                    | 360 |
| opossum       | HS--HTKINGAHHSTVQGPSSTKSTSSLPVSKAASSALSKPSDCNFISDFYSRSLHHI   |                    | 363 |
| bat           | HT--NTKINGAHHSTVQGPSSTKST-SVPSLSKAAPSVPSRP                   | SDCSFISDFYSHSRLHHI | 360 |
| frog          | HT--NSKINGAHHSL-PGPSSTSTTA--LSPAKLASLQLPKTADPNFISDFYSHSRLHHI |                    | 358 |
| lizard        | HS--NIKRNGAHHSTVQGPSSTKSTT--VPSNKVESPLSKPPNCSFISDFYSRSLHHI   |                    | 355 |
| zebrafish     | HDQTTVRLNGSYHVTSN-----SSTLANSSNQSGKSSAEAGI                   | ISEFFSHSRLHHI      | 391 |
| chicken       | HS--NTKINGAHHSTVQGPSSTKSTS-VPTPSKAASLSVSKPSDCSFISDFYSRSLHHI  |                    | 366 |
| fruitfly      | TN-----L-----STTSNNSTTARTAADPNFLSEFYKNSRLHHI                 |                    | 231 |
| leishmania    | MTAMS-R-----SVRDQANSLQHFFQQHSRLYFI                           |                    | 30  |
| trypanosoma   | MSGKK-N-----VSVGRKWACDQVNSVRHFQQHSRLHFI                      |                    | 33  |
| saccharomyces | -----LNNLEAKRIVACDDPDFLTSYFAHSRLHHL                          |                    | 328 |
| fission_yeast | HNY-----QLLKNPNVRNSTTQNQDFLENFFSSRLHHL                       |                    | 244 |
| arabidopsis   | HSTSDNK--SVHA--NGKNGGK--SIATAAGSSTRRHSTLEDPNFVENYFKNSRLHFI   |                    | 339 |

: .:. .:. \*\*\*\*\*:

|               |                                                             |                                          |     |
|---------------|-------------------------------------------------------------|------------------------------------------|-----|
| human         | SMWKCELTEFVNTLQRQ----                                       | SNGIFPGREKLKKMKTGRSALVVTDTGDMSVLNSPRHQS  | 417 |
| chimpanzee    | SMWKCELTEFVNTLQRQ----                                       | SNGIFPGREKLKKMKTGRSALVVTDTGDMSVLNSPRHQS  | 417 |
| gorilla       | SMWKCELTEFVNTLQRQ----                                       | SNGIFPGREKLKKMKTGRSALVVTDTGDMSVLNSPRHQS  | 417 |
| rhesus        | SMWKCELTEFVNTLQRQ----                                       | SNGIFPGREKLKKMKTGRSALVVTDTGDMSVLNSPRHQS  | 451 |
| cattle        | SAWKWELTEFVNALQKQ----                                       | SSGVFPGREKLKKMKAGRSALVVTDTGNMSVLSSPRHQS  | 417 |
| sheep         | STWKCELTEFVNALQKQ----                                       | SSGIFPGREKLKKMKAGRSALVVADTGNMSVLSSPRHQS  | 411 |
| pig           | SMWKCELTEFVNTLQRQ----                                       | SSGIFPGREKLKKMKTGRSALVVTDTGNMSVLSSPRHQS  | 457 |
| mouse         | STWKCELTEFVNTLQRQ----                                       | SSGIFPGREKLKKVKTGRSSLVVTDTGTMSVLSSPRHQS  | 415 |
| dog           | SMWKCELTEFVNTLQRQ----                                       | SSGVFPGREKLKKMKTGRSTLVVTDTGNMSVLSSPRHQS  | 417 |
| cat           | SMWKCELTEFVNTLQRQ----                                       | SSGIFPGREKLKKMKTGRSALVVTDTGNMSVLSSPRHQS  | 416 |
| opossum       | SMWKCELTEFVNTLQRQ----                                       | SSGVFPGREKLKKMKASRSALIIITDAGNMSVLNPSRHQS | 419 |
| bat           | SMWKCEFTEFVNTLQRQ----                                       | SSGIFPGREKLKKMKTGRSALVVTDTGNMSVLSSPRHQS  | 416 |
| frog          | STWKCEFTEFVRGLQTQ----                                       | SNKGFPGRERLKKLKP-----NMPPSTLPKCQN        | 404 |
| lizard        | ATWKSEFTDFVNTLQKQ----                                       | NNAIFPGREKLKKLKAGQSILNKADSDYAATLSSTKHQS  | 411 |
| zebrafish     | STWRNEFSEYVNSLQSRRAAGGAVFSGREKLKKLKANCNSVSHFDPGSLMA-APQVRQS |                                          | 450 |
| chicken       | STWKCELTEFVNSLQKQ----                                       | NSGVFPGREKLKKWKAGRSAL-KTDTGNVSVASSAKPQS  | 421 |
| fruitfly      | ATLGAGFKQYVCRLRQK---                                        | HGTQGFPKRETLSLANSH-----HNCLER            | 273 |
| leishmania    | GQWRTKMEDVFR-----                                           | EWFIHPEWNHGTL---EQQR                     | 57  |
| trypanosoma   | GQWTKAHDLFK-----                                            | DWFAVHPTWNHGVL---SHQA-                   | 63  |
| saccharomyces | SAWKANLKDKFLNENIH-----                                      | KYT-----KITDKDITY                        | 356 |
| fission_yeast | STWKADFKNEIQAMTTA-----                                      | SEPVRPIM-----KDKSKKS                     | 277 |
| arabidopsis   | GTWRNRYRKRFGSSNG-----                                       | LK-----WADSGQN--TAEMAKKS                 | 373 |

|               |                                                               |         |
|---------------|---------------------------------------------------------------|---------|
| human         | CIMHVDMDCFFVSVGIRNRP-----DLKGKPVAVTSNRGTGRA---PLRPGANPQLEWQ   | 468     |
| chimpanzee    | CIMHVDMDCFFVSVGIRNRP-----DLKGKPVAVTSNRGTGRA---PLRPGANPQLEWQ   | 468     |
| gorilla       | CIMHVDMDCFFVSVGIRNRP-----DLKGKPVAVTSNRGTGRA---PLRPGANPQLEWQ   | 468     |
| rhesus        | CIMHVDMDCFFVSVGIRNRP-----DLKGKPVAVTSNRGTGRA---PLRPGANPQLEWQ   | 502     |
| cattle        | CIMHVDMDCFFVSVGIRNRP-----DLKGKPVAVTSNRGTGRA---PLRPGANPQLEWQ   | 468     |
| sheep         | CIMHVDMDCFFVSVGIRNRP-----DLKGKPVAVTSNRGTGRA---PLRPGANPQLEWQ   | 462     |
| pig           | CIMHVDMDCFFVSVGIRNRP-----DLKGKPVAVTSNRGTGRA---PLCPGANPQLEWQ   | 508     |
| mouse         | CVMHVDMDCFFVSVGIRNRP-----DLKGKPVAVTSNRGTGTA---PLRPGANPQLEWQ   | 466     |
| dog           | CIMHVDMDCFFVSVGIRNRP-----DLKGKPVAVTSNRGTGRA---PLRPGANPQLEWQ   | 468     |
| cat           | CIMHVDMDCFFVSVGIRNRP-----DLKGKPVAVTSNRGTGRA---PLRPGANPQLEWQ   | 467     |
| opossum       | CIMHVDMDCFFVSVGIRNRP-----DLKGKPVAVTSNRGTGRA---PLRPGANPQLEWQ   | 470     |
| bat           | CIMHVDMDCFFVSVGIRNRP-----DLKGKPVAVTSNRGTGRA---PLRPGANPQLEWQ   | 467     |
| frog          | CIIHVDMDCFFVSVAIRNRP-----DLKGKPVAVTSNRGAGTT---TTREGANPQLEFQ   | 455     |
| lizard        | CIMHVDMDCFFVSVGIRGRP-----DLKGKPVAVTSNRGSGKS---LLRPGANPQLEWQ   | 462     |
| zebrafish     | CVLHVDMDCFFVSVGIRHRP-----DLIGKPVAVTSNRGPGRV---AQRPGANPQLEFQ   | 501     |
| chicken       | CIMHVDMDCFFVSVAIRNRP-----DLKGKPVAVTSNRGAGKA---PLRPGANPQLEWQ   | 472     |
| fruitfly      | YVMHIDMDCFFVSVGLRTRP-----ELRGLPIAVTHSKGGNAATDVPVHPQADRKAELE   | 327     |
| leishmania    | TFVHVDMDAFFCSVQLA-KP---EYAHLKTKPVGIAAGK-----                  | 92      |
| trypanosoma   | LFVHLMDAFAFFCSVLA-KE---ENAHMREKPVCAAGK-----                   | 98      |
| saccharomyces | IIFHIDFDCFFATVAYLCRSSFSACDFKRDPIVCHG-----                     | 394     |
| fission_yeast | FLLHVDFDCFFASVSTRFSH-----ELRLKPVAVAHG-----                    | 309     |
| arabidopsis   | TIIHIDLDCFFVSVVIK NRL-----ELHDKPVAVCHSDNP-----                | 408     |
|               | ::*:*:*****.*                                                 | :: *:.* |
| human         | YYQNKILKGKAA-----DIPDSSLWENPDSAQANGIDS---VLSRAEIASCSYEAR----  | 516     |
| chimpanzee    | YYQNKILKGKAA-----DIPDSSLWENPDSAQANGIDS---VLSRAEIASCSYEARS LKV | 520     |
| gorilla       | YYQNKILKGKAA-----DIPDSSLWENPDSAQANGIDS---VLSRAEIASCSYEARS LKV | 520     |
| rhesus        | YYQNKILKGKAA-----DIPDSSLWENPDSAQANGIDS---VLSKAEIASCSYEAR----  | 550     |
| cattle        | YYQNKILRGKAA-----EIPDPSTWESQDSAQINGIDS---VLSKAEIASCSYEAR----  | 516     |
| sheep         | YYQNKILRGKAA-----EIPDPSTWESQDSAQINGIDS---VLSKAEIASCSYEAR----  | 510     |
| pig           | YYQNKLLKGRAA-----EIPDSSMWENQDSAQTNGIDY---VLSKAEIASCSYEAR----  | 556     |
| mouse         | YYQNRALRGKAA-----DIPDSSVWENQDSTQTNGIDS---VLSKAEIASCSYEAR----  | 514     |
| dog           | YYQNKILKGKAA-----EIPDSSMWENQDSAQANGIDS---VLSKAEIASCSYEAR----  | 516     |
| cat           | YYQNKILKGKAA-----KIPDSSMWENQDSAQANGIDS---VLSKAEIASCSYEAR----  | 515     |
| opossum       | YYQNKILKGKAAD-RVPDVPDASLLENQDSAQTNGIDS---VLSKAEIASCSYEAR----  | 522     |
| bat           | YYQNKILKGKAA-----DMPDSSLWENQDSAQTNGIDS---VLSKAEIASCSYEAR----  | 515     |
| frog          | YYQNRILKGKAEIPNEQDQP---TSISSDSAQONGLDLDISHLSMAEIASCSYEAR----  | 508     |
| lizard        | YYQNKLLNGKAAGATELDSPD---DDNPESTQVNGIDLEISVQSMAEIASCSYEAR----  | 515     |
| zebrafish     | YYQNKQKHRYKEKTDG-D-LEMTSPQDGEVPSNGVHEDLAALSMAEIASCSYEAR----   | 555     |
| chicken       | YYQNKLLNGKAAEIRVPDKLDSWVWEHSDSAHMNGVDCDLTVLSMAEIASCSYEAR----  | 528     |
| fruitfly      | LFAQRFEHHFHDG-----DKAEKVRSGFDK---KMSLSEIASCSYEAR----          | 367     |
| leishmania    | -----YNSDISSCN YVAR-----                                      | 105     |
| trypanosoma   | -----GNSDISSS-NYIAR----                                       | 111     |
| saccharomyces | -----TKNSDIASCN YVAR----                                      | 408     |
| fission_yeast | -----IKNSEIASCN YVAR----                                      | 323     |
| arabidopsis   | -----KGTAEISSANYPAR----                                       | 422     |
|               | ::*:*. * *                                                    |         |

**Figure S10.** Alignment of the Rev1 polymerase domain from multiple species. Name of each species is indicated on the left of each sequence as its trivial/common name: human, *Homo sapiens*; chimpanzee, *Pan troglodytes*; gorilla, *Gorilla gorilla gorilla*; rhesus, *Macaca mulatta*; cattle, *Bos taurus*; sheep, *Ovis aries*; pig, *Sus domesticus*; mouse, *Mus musculus*; dog, *Canis familiaris*; cat, *Felis catus*; opossum, *Monodelphis domestica*; bat, *Desmodus rotundus*; frog, *Xenopus tropicalis*; lizard, *Zootoca vivipara*; zebrafish, *Danio rerio*; Chicken, *Gallus gallus domesticus*; fruitfly, *Drosophila melanogaster*; leishmania *Leishmania donovani*; trypanosome, *Trypanosoma cruzi*; saccharomyces, *Saccharomyces cerevisiae*; fission yeast,

*Schizosaccharomyces pombe*; arabidopsis, *Arabidopsis thaliana*. The top sequence is of the human Rev1 protein, with the domains colored as: *orange*, N-digit (a.a. 344-377); *light grey*, insert 1 (a.a. 379-417); *red*, palm 1 (a.a. 418-425); *blue*, finger (a.a. 427-447 & 505-516); *dark grey*, insert 2 (a.a. 448-504).

## REFERENCES

1. Seidman, M.M., Dixon, K., Razzaque, A., Zagursky, R.J. and Berman, M.L. (1985) A shuttle vector plasmid for studying carcinogen-induced point mutations in mammalian cells. *Gene*, **38**, 233–237.
